# Supplementary material for: Poly(carbonate acetal) vitrimers with enhanced thermal properties and closed-loop thermal recyclability derived from waste polycarbonate-derived polyaldehyde and pentaerythritol/erythritol/d-sorbitol
Source: Royal Society of Chemistry journal article supplement (doi:10.1039/d4gc02934h), 2024-01-01
Supplement: d4gc02934h1.pdf [file d4gc02934h1.pdf]

Supplementary information

**Poly(carbonate acetal) Vitrimers with Enhanced Thermal Properties and Closed-Loop Thermal Recyclability Derived from Waste Polycarbonate-Derived Polyaldehyde and Pentaerythritol/Erythritol/D-Sorbitol**

Yi-Chun Chen<sup>†‡</sup>, Kamani Sudhir K. Reddy<sup>†</sup>, and Ru-Jong Jeng<sup>‡\*</sup>, Ching-Hsuan Lin<sup>†\*</sup>

<sup>†</sup>Department of Chemical Engineering, National Chung Hsing University, Taichung 40227, Taiwan.

<sup>‡</sup> Institute of Polymer Science and Engineering, National Taiwan University, Taipei 106319, Taiwan.

Corresponding Email: [rujong@ntu.edu.tw](mailto:rujong@ntu.edu.tw); [linch@nchu.edu.tw](mailto:linch@nchu.edu.tw)

| <b>S.No.</b> | <b>Table of contents</b>                                                                                                           | <b>P. No.</b> |
|--------------|------------------------------------------------------------------------------------------------------------------------------------|---------------|
| 1            | Table S1. The thermal and mechanical properties of original PCAs with x=1-4.                                                       | S4            |
| 2            | Table S2. The thermal and mechanical properties of the first reprocessed PCAs with x=1-4.                                          | S5            |
| 3            | Table S3. The thermal and mechanical properties for the original, the first reprocessed, and the second reprocessed PCAs with x=2. | S6            |
| 4            | Table S4. Recovery yields of R-WPC-CHO-1 to 4, and R-PT-1 to 4 after acid hydrolysis of PCA-P1 to 4.                               | S7            |

| <b>S.No.</b> | <b>Scheme of contents</b>               | <b>P. No.</b> |
|--------------|-----------------------------------------|---------------|
| 1            | Scheme S1. Acetal metathesis of PCA-Px. | S7            |

| <b>S.No.</b> | <b>Figure of contents</b>                                                                                                                                                                                  | <b>P. No.</b> |
|--------------|------------------------------------------------------------------------------------------------------------------------------------------------------------------------------------------------------------|---------------|
| 1            | Figure S1. (a) HSQC, (b) $^{13}\text{C}$ NMR spectrum of WPC-CHO/NG.                                                                                                                                       | S8            |
| 2            | Figure S2. (a) HSQC, (b) $^{13}\text{C}$ NMR spectrum of WPC-CHO/GC.                                                                                                                                       | S9            |
| 3            | Figure S3. Enlarged FTIR spectra of WPC-CHO, WPC-CHO/NG and WPC-CHO/GC.                                                                                                                                    | S10           |
| 4            | Figure S4. Photos of PCA-Px, PCA-Ex and PCA-Sx films where 'x' denotes the mole percentage of pTSA used. Brittle films were obtained if $x=0.5$ , while flexible PCA films can be obtained if $x \geq 1$ . | S10           |
| 5            | Figure S5. The overlapping presentation of FTIR spectra of the acetal formation of PCA-P2 at accumulative curing at each temperature for 20 min.                                                           | S11           |
| 6            | Figure S6. (a) DMA thermogram, (b) TGA thermogram, and (c) stress-strain curves of original PCAs with $x = 1-4$ .                                                                                          | S12           |
| 7            | Figure S7. (a-b) DMA thermograms, (c-b) TGA thermograms, and (e-f) stress-strain curves of the first reprocessed PCAs with $x = 1-4$ .                                                                     | S13           |
| 8            | Figure S8. (a-b) DMA thermograms, (c-b) TGA thermograms, and (e-f) stress-strain curve for the original, the first reprocessed, and the second reprocessed PCAs with $x = 2$ .                             | S14           |
| 9            | Figure S9. The graph of $\log \eta$ vs $1000/T$ for $T_v$ determination.                                                                                                                                   | S15           |
| 10           | Figure S10. (a) Solvent resistance test of PCA-P2, PCA-E2, and PCA-S2. (b-c) DMA thermograms and (d-e) TGA thermograms of original PCA and solvent-immersed PCA films.                                     | S16           |
| 11           | Figure S11. $^1\text{H}$ -NMR spectra of the precipitate in the acid degradation of PCA-Px.                                                                                                                | S17           |
| 12           | Figure S12. $^1\text{H}$ -NMR spectra of the fresh and recycled pentaerythritol.                                                                                                                           | S17           |
| 13           | Figure S13. Schematic procedure used for preparing the CFRPs                                                                                                                                               | S18           |

## Synthesis of WPC-CHO

Dry WPC 10 g (39.32 mmol of repeating unit) and VNEP 16.35 g (78.65 mmol) were taken into mortar and ground vigorously to get a homogeneous mixing. The fine powder of reactants were then carefully poured into a schlenk flask, then a catalytic amount of DMAP or TBAB (1 wt% to VNEP) was then added into the reactor, degassed the vessel using a vacuum for 10 min, purged with N<sub>2</sub> gas, and heated to 150 °C for 3 h. Upon cooling to room temperature, the rock-solid substance was scratched out (otherwise dissolved into a minimum amount of DMAc) and washed with 1000 mL MeOH/H<sub>2</sub>O (1/1, v/v) twice. The precipitate was then washed with 200 mL of hot ethanol (70 °C) twice and then dried under reduced pressure at 80 °C. WPC-CHO (brown color, yield 97% for DMAP-catalyzed; light brown color, yield 95% for TBAB-catalyzed) was obtained. <sup>1</sup>H-NMR (DMSO-d<sub>6</sub>, δ ppm, 400 MHz): 9.83 (H1, 2H), 9.18 (-OH, 2H), 7.51 (H3, 2H), 7.39 (H7, 2H), 7.20 (H4, 2H), 7.03 (H14, 4H), 6.83 (H15, 4H), 5.35 (H10, 2H), 4.4 – 4.02 (H9, and H11, 8H), 3.88 – 3.72 (H8, 6H), and 1.54 (H18, 6H). <sup>13</sup>C NMR (DMSO-d<sub>6</sub>, δ ppm, 150 MHz): 191.3, 156.2, 155.7, 153.6, 152.7, 149.3, 143.1, 142.6, 130.21, 129.7, 127.7, 126.0, 125.7, 114.6, 113.9, 112.7, 112.3, 110.2, 109.7, 74.4, 70.1, 69.1, 67.3, 66.9, 65.8, 39.9, 39.1, and 30.7. FTIR (KBr-pellet, cm<sup>-1</sup>): 3570 (phenolic -OH), 3060 - 2763 (aromatic CH), 1753 (aliphatic carbonate), 1681 (aldehyde carbonyl), 1256 (C-O, of carbonate), and 1129, 1025 (aromatic-aliphatic C-O). Number-average molecular weight 7251 g/mol, weigh-average molecular weight 13842 g/mol.

Note: VNEP is prepared as per the literaute.<sup>1</sup>

Table S1. The thermal and mechanical properties of original PCAs with x=1-4.

| Sample code. | T <sub>d5%</sub><br>(°C) <sup>a</sup> | CY<br>(%) <sup>b</sup> | T <sub>g</sub> (°C)<br>DMA | E' at<br>T <sub>g</sub> +40<br>°C<br>(MPa) | Crosslinking<br>density<br>(mmol* cm <sup>-3</sup> ) | σ<br>(MPa) <sup>f</sup> | ε<br>(%) <sup>g</sup> |
|--------------|---------------------------------------|------------------------|----------------------------|--------------------------------------------|------------------------------------------------------|-------------------------|-----------------------|
| PCA-P1       | 358                                   | 24.8                   | 176                        | 23.94                                      | 1.96                                                 | 36.2                    | 2.5                   |
| PCA-P2       | 354                                   | 25.4                   | 178                        | 29.52                                      | 2.41                                                 | 34.9                    | 2.7                   |
| PCA-P3       | 351                                   | 24.5                   | 178                        | 29.53                                      | 2.41                                                 | 37.8                    | 2.7                   |
| PCA-P4       | 347                                   | 26.1                   | 178                        | 29.64                                      | 2.42                                                 | 31.3                    | 2.7                   |
| PCA-E1       | 337                                   | 20.1                   | 142                        | 10.32                                      | 0.91                                                 | 33.8                    | 2.3                   |
| PCA-E2       | 342                                   | 18.8                   | 142                        | 10.0                                       | 0.88                                                 | 33.5                    | 2.6                   |
| PCA-E3       | 338                                   | 19.7                   | 142                        | 8.86                                       | 0.78                                                 | 37.7                    | 2.3                   |
| PCA-E4       | 337                                   | 19.7                   | 142                        | 9.18                                       | 0.81                                                 | 32.8                    | 2.8                   |
| PCA-S1       | 369                                   | 24.6                   | 178                        | 39.21                                      | 3.20                                                 | 46.8                    | 4.1                   |
| PCA-S2       | 373                                   | 23.4                   | 178                        | 45.92                                      | 3.75                                                 | 46.4                    | 4.3                   |
| PCA-S3       | 352                                   | 23.9                   | 178                        | 49.26                                      | 4.02                                                 | 45.8                    | 4.2                   |
| PCA-S4       | 350                                   | 25.0                   | 178                        | 44.23                                      | 3.61                                                 | 45.4                    | 4.5                   |

<sup>a</sup> TGA was measured at a heating rate of 20 °C/min. <sup>b</sup> Residual weight % at 800 °C. <sup>c</sup> TMA was measured at a heating rate of 5 °C/min. <sup>d</sup> DMA was measured at a heating rate of 5 °C/min. <sup>f</sup> Tensile strength. <sup>g</sup> Elongation at the break.

Table S2. The thermal and mechanical properties of the first reprocessed PCAs with x=1-4.

| Sample code | T <sub>d5%</sub> (°C) <sup>a</sup> | CY (%) <sup>b</sup> | T <sub>g</sub> (°C) DMA <sup>d</sup> | E' at T <sub>g</sub> +40 °C (MPa) | Crosslinking density (mmol* cm <sup>-3</sup> ) | σ (MPa) <sup>f</sup> | ε (%) <sup>g</sup> |
|-------------|------------------------------------|---------------------|--------------------------------------|-----------------------------------|------------------------------------------------|----------------------|--------------------|
| PCA-P1-R1   | 347                                | 23.9                | 174                                  | 23.9                              | 1.97                                           | 33.7                 | 3.2                |
| PCA-P2-R1   | 354                                | 25.9                | 175                                  | 21.3                              | 1.75                                           | 35.8                 | 3.1                |
| PCA-P3-R1   | 358                                | 26.0                | 176                                  | 20.9                              | 1.71                                           | 35.4                 | 3.5                |
| PCA-P4-R1   | 356                                | 26.7                | 176                                  | 30.9                              | 2.53                                           | 34.0                 | 3.6                |
| PCA-E1-R1   | 339                                | 20.7                | 135                                  | 5.6                               | 0.50                                           | 24.2                 | 2.2                |
| PCA-E2-R1   | 345                                | 22.5                | 141                                  | 6.6                               | 0.58                                           | 23.6                 | 2.1                |
| PCA-E3-R1   | 355                                | 20.3                | 142                                  | 5.2                               | 0.46                                           | 23.6                 | 2.3                |
| PCA-E4-R1   | 350                                | 20.8                | 142                                  | 4.2                               | 0.37                                           | 27.0                 | 2.4                |
| PCA-S1-R1   | 371                                | 23.9                | 168                                  | 30.12                             | 2.51                                           | 44.8                 | 3.7                |
| PCA-S2-R1   | 363                                | 24.5                | 169                                  | 33.01                             | 2.75                                           | 46.1                 | 3.6                |
| PCA-S3-R1   | 362                                | 25.8                | 168                                  | 30.62                             | 2.55                                           | 40.4                 | 3.9                |
| PCA-S4-R1   | 357                                | 26.1                | 170                                  | 35.17                             | 2.92                                           | 39.8                 | 3.9                |

*a* TGA was measured at a heating rate of 20 °C/min. *b* Residual weight % at 800 °C. *d* DMA was measured at a heating rate of 5 °C/min. *f* Tensile strength. *g* Elongation at the break.

Table S3. The thermal and mechanical properties for the original , the first reprocessed , and the second reprocessed PCAs with x=2.

| Sample code.     | T <sub>d5%</sub> (°C) <sup>a</sup> | CY (%) <sup>b</sup> | T <sub>g</sub> (°C) DMA | E' at T <sub>g</sub> + 40 °C (MPa) | Crosslinking density (mmol* cm <sup>-3</sup> ) | σ (MPa) <sup>f</sup> | ε (%) <sup>g</sup> |
|------------------|------------------------------------|---------------------|-------------------------|------------------------------------|------------------------------------------------|----------------------|--------------------|
| <b>PCA-P2</b>    | 354                                | 25.4                | 178                     | 29.52                              | 2.41                                           | 34.9                 | 2.7                |
| <b>PCA-P2-R1</b> | 354                                | 25.9                | 175                     | 21.3                               | 1.75                                           | 35.8                 | 3.1                |
| <b>PCA-P2-R2</b> | 348                                | 25.5                | 173                     | 19.7                               | 1.63                                           | 32.6                 | 2.9                |
| <b>PCA-E2</b>    | 342                                | 18.8                | 142                     | 10.0                               | 0.88                                           | 33.5                 | 2.6                |
| <b>PCA-E2-R1</b> | 345                                | 22.5                | 141                     | 6.6                                | 0.58                                           | 23.6                 | 2.1                |
| <b>PCA-E2-R2</b> | 333                                | 19.9                | 142                     | 9.8                                | 0.86                                           | 22.1                 | 2.1                |
| <b>PCA-S2</b>    | 373                                | 23.4                | 178                     | 45.92                              | 3.75                                           | 46.4                 | 4.3                |
| <b>PCA-S2-R1</b> | 363                                | 24.5                | 169                     | 33.01                              | 2.75                                           | 46.1                 | 3.6                |
| <b>PCA-S2-R2</b> | 370                                | 25.6                | 172                     | 35.82                              | 2.96                                           | 46.0                 | 3.3                |

*a* TGA was measured at a heating rate of 20 °C/min. *b* Residual weight % at 800 °C. *d* DMA was measured at a heating rate of 5 °C/min. *f* Tensile strength. *g* Elongation at the break.

Table S4. Recovery yields of R-WPC-CHO-1 to 4, and R-PT-1 to 4 after acid hydrolysis of PCA-P1 to 4.

| PCA used | Recovered product | Yield (%) |
|----------|-------------------|-----------|
| PCA-P1   | R-WPC-CHO-1       | 91        |
|          | R-PT-1            | 62        |
| PCA-P2   | R-WPC-CHO-2       | 93        |
|          | R-PT-2            | 60        |
| PCA-P3   | R-WPC-CHO-3       | 94        |
|          | R-PT-3            | 63        |
| PCA-P4   | R-WPC-CHO-4       | 92        |
|          | R-PT-4            | 62        |

Scheme S1. Acetal metathesis of PCA-Px.

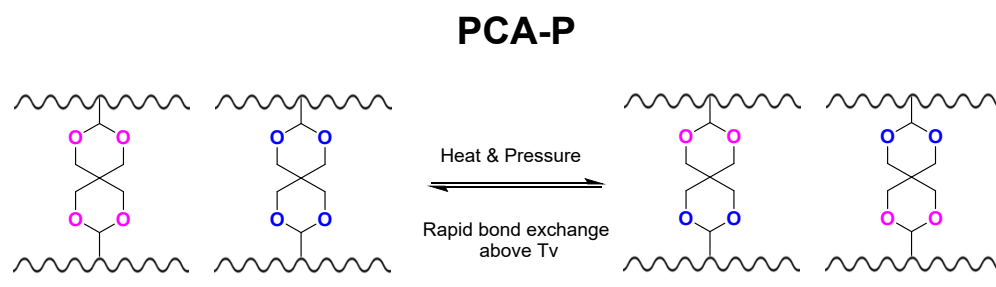

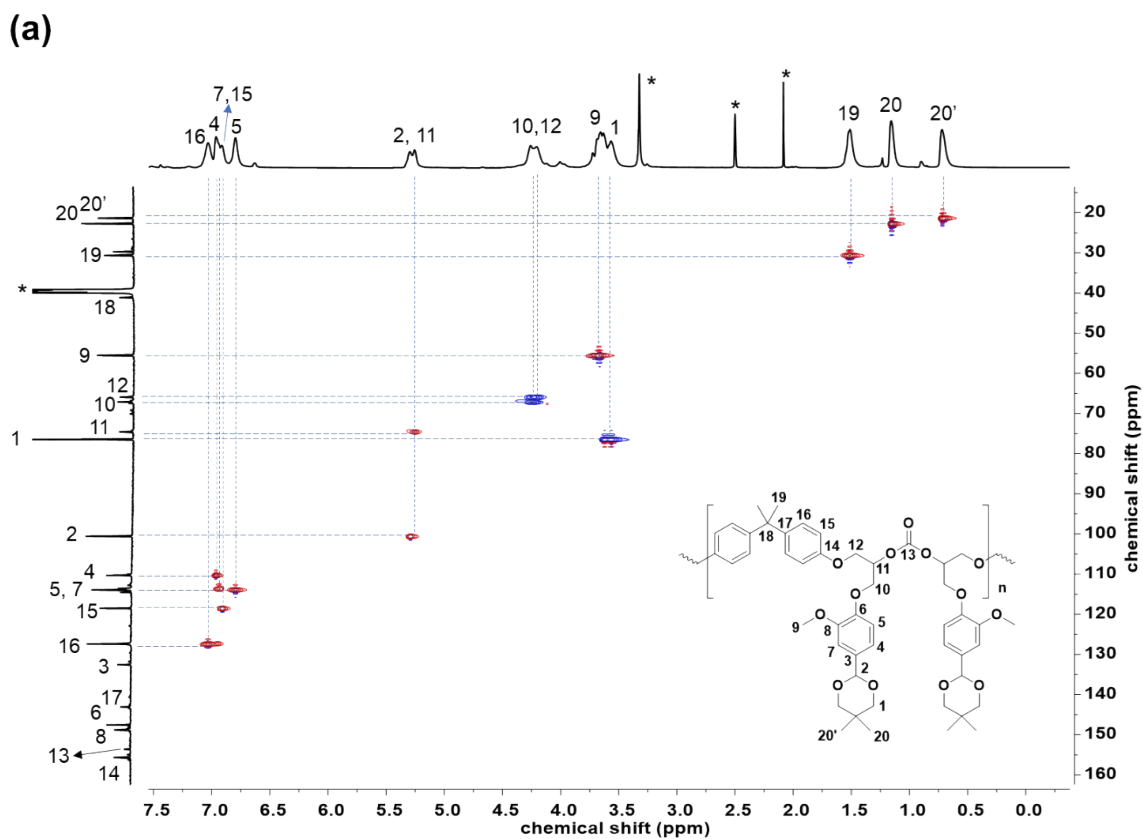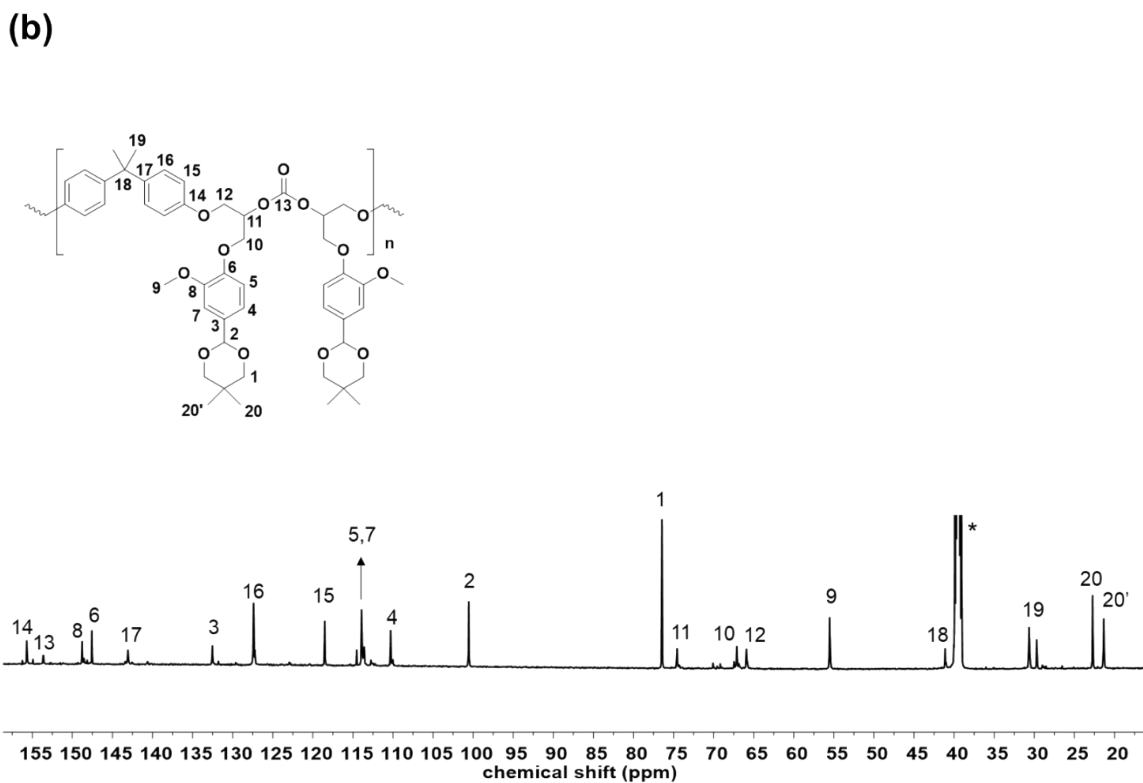

Figure S1. (a) HSQC, (b)  $^{13}\text{C}$  NMR spectrum of WPC-CHO/NG.



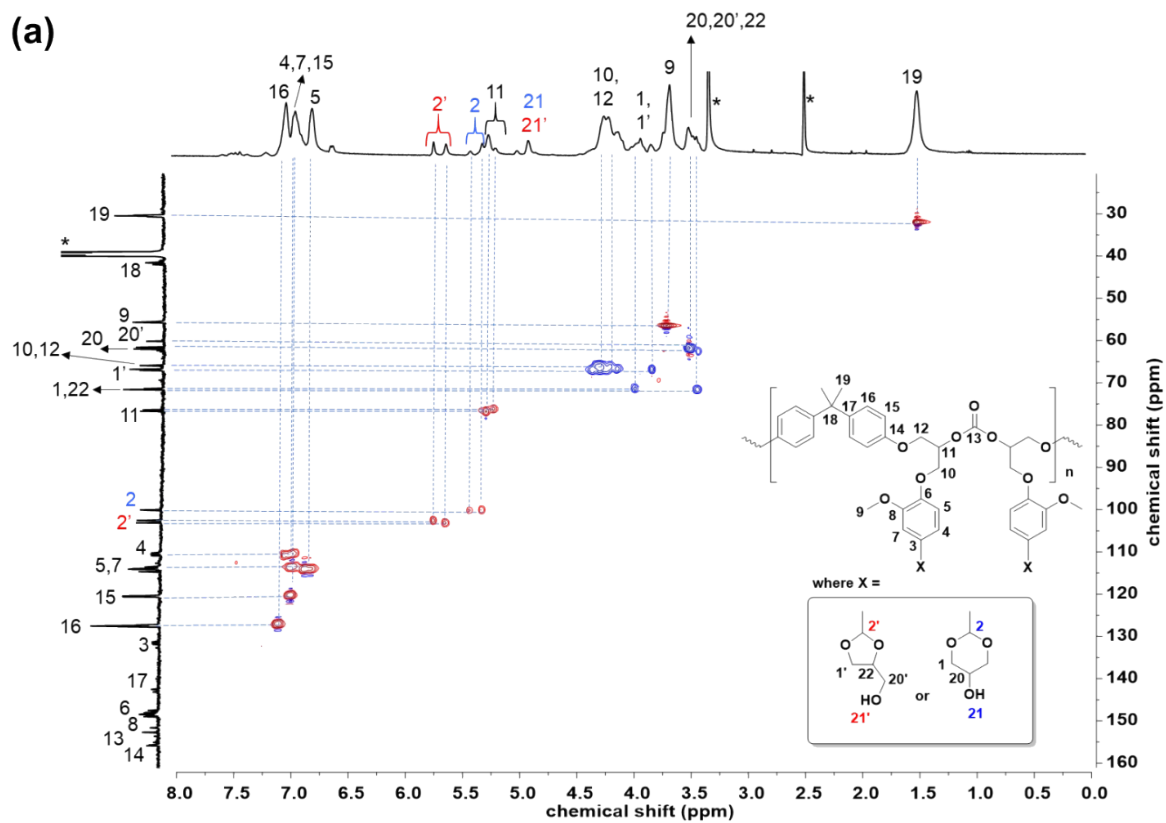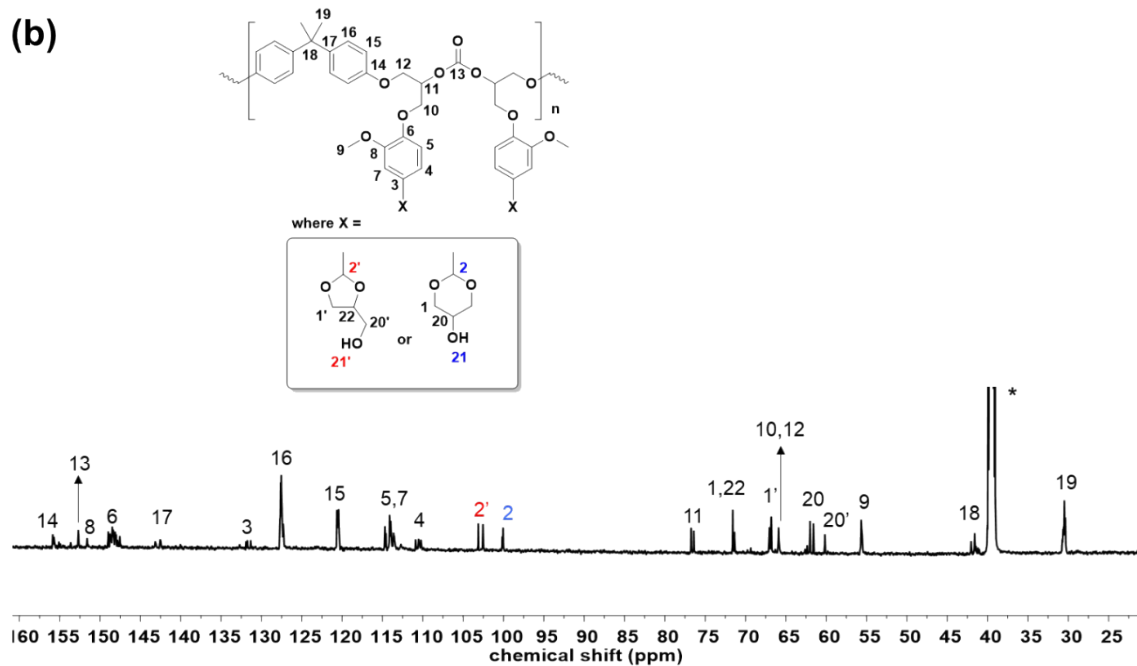

Figure S2. (a) HSQC, (b)  $^{13}\text{C}$  NMR spectrum of WPC-CHO/GC.

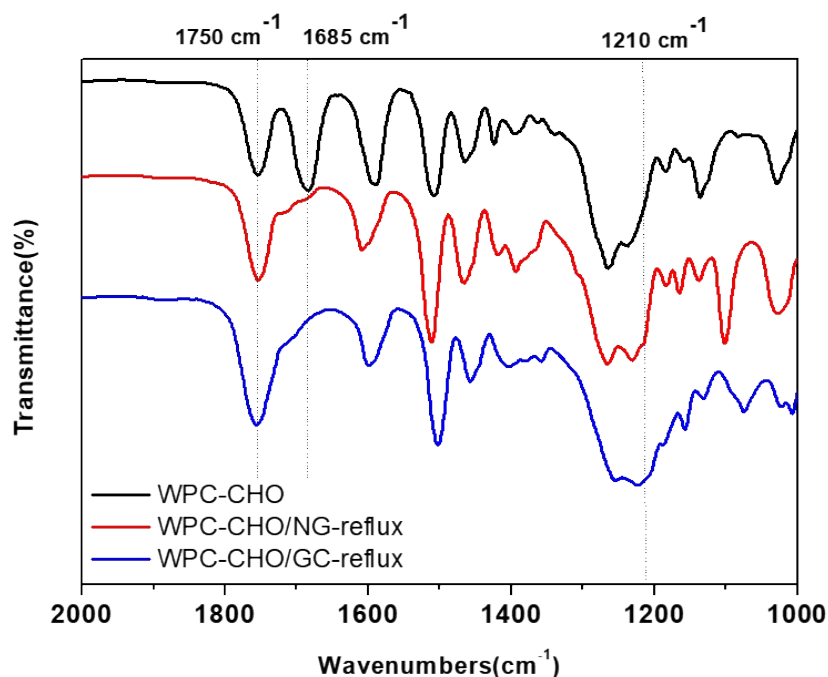

Figure S3. Enlarged FTIR spectra of WPC-CHO, WPC-CHO/NG and WPC-CHO/GC.

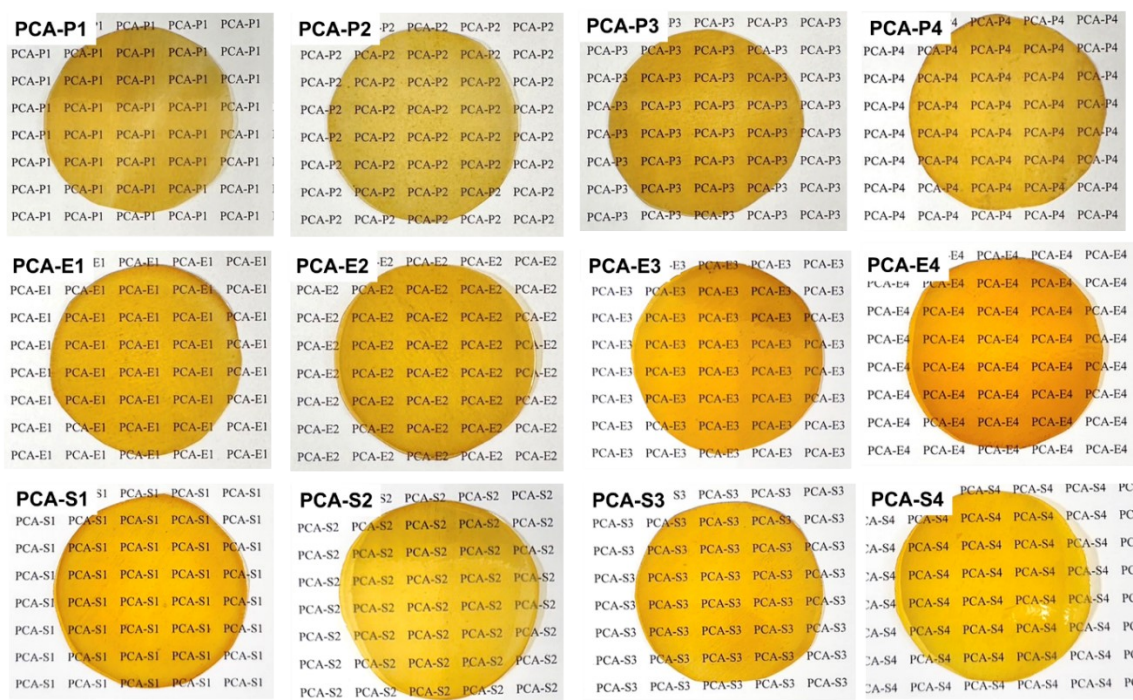

Figure S4. Photos of PCA-P<sub>x</sub>, PCA-E<sub>x</sub> and PCA-S<sub>x</sub> films where 'x' denotes the mole percentage of pTSA used. Brittle films were obtained if x=0.5, while flexible PCA films can be obtained if x = 1-4.

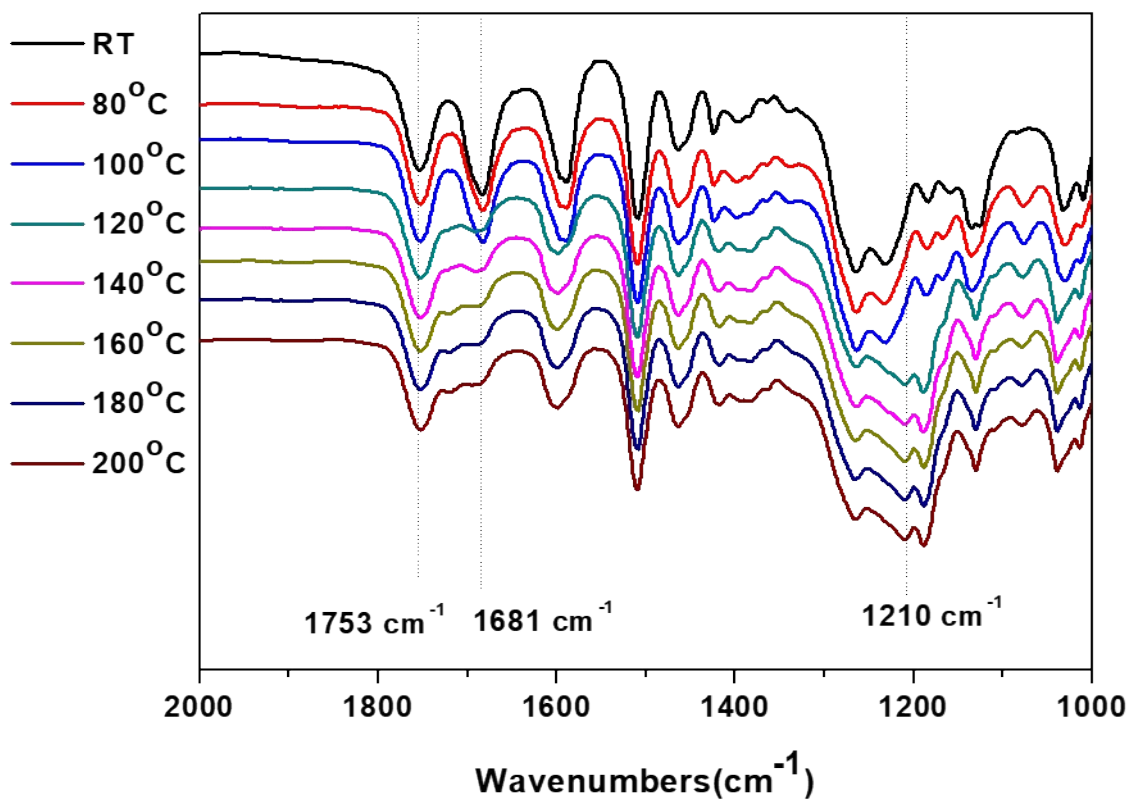

Figure S5. The overlapping presentation of FTIR spectra of the acetal formation of PCA-P2 at accumulative curing at each temperature for 20 min.

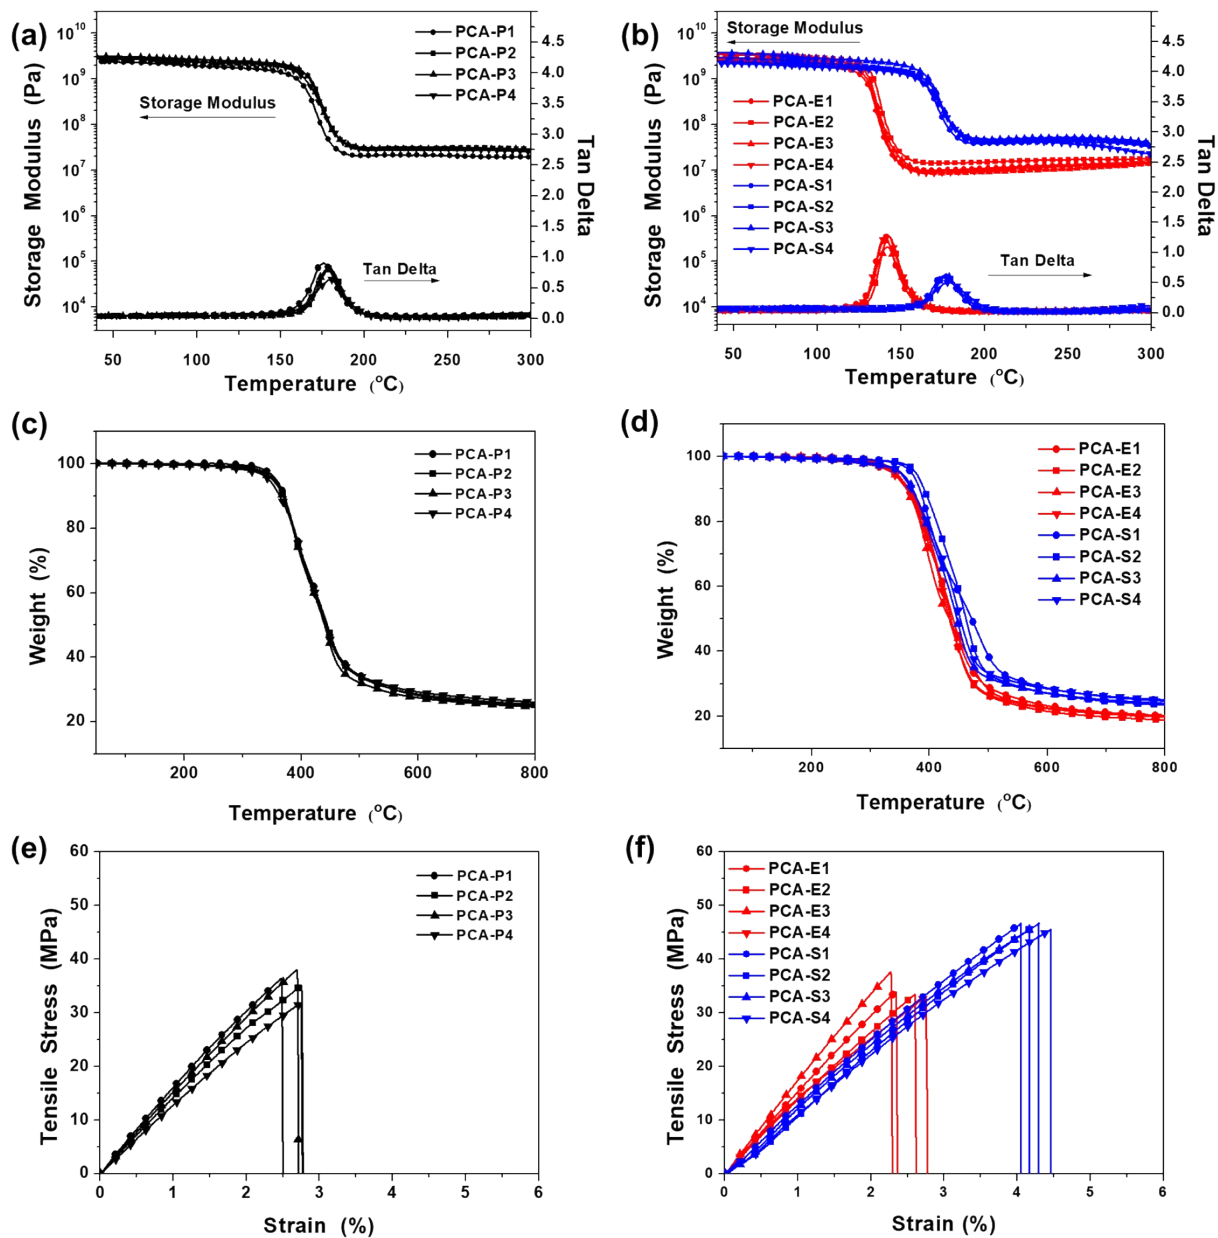

Figure S6. (a) DMA thermogram, (b) TGA thermogram, and (c) stress-strain curves of original PCAs with  $x = 1-4$ .

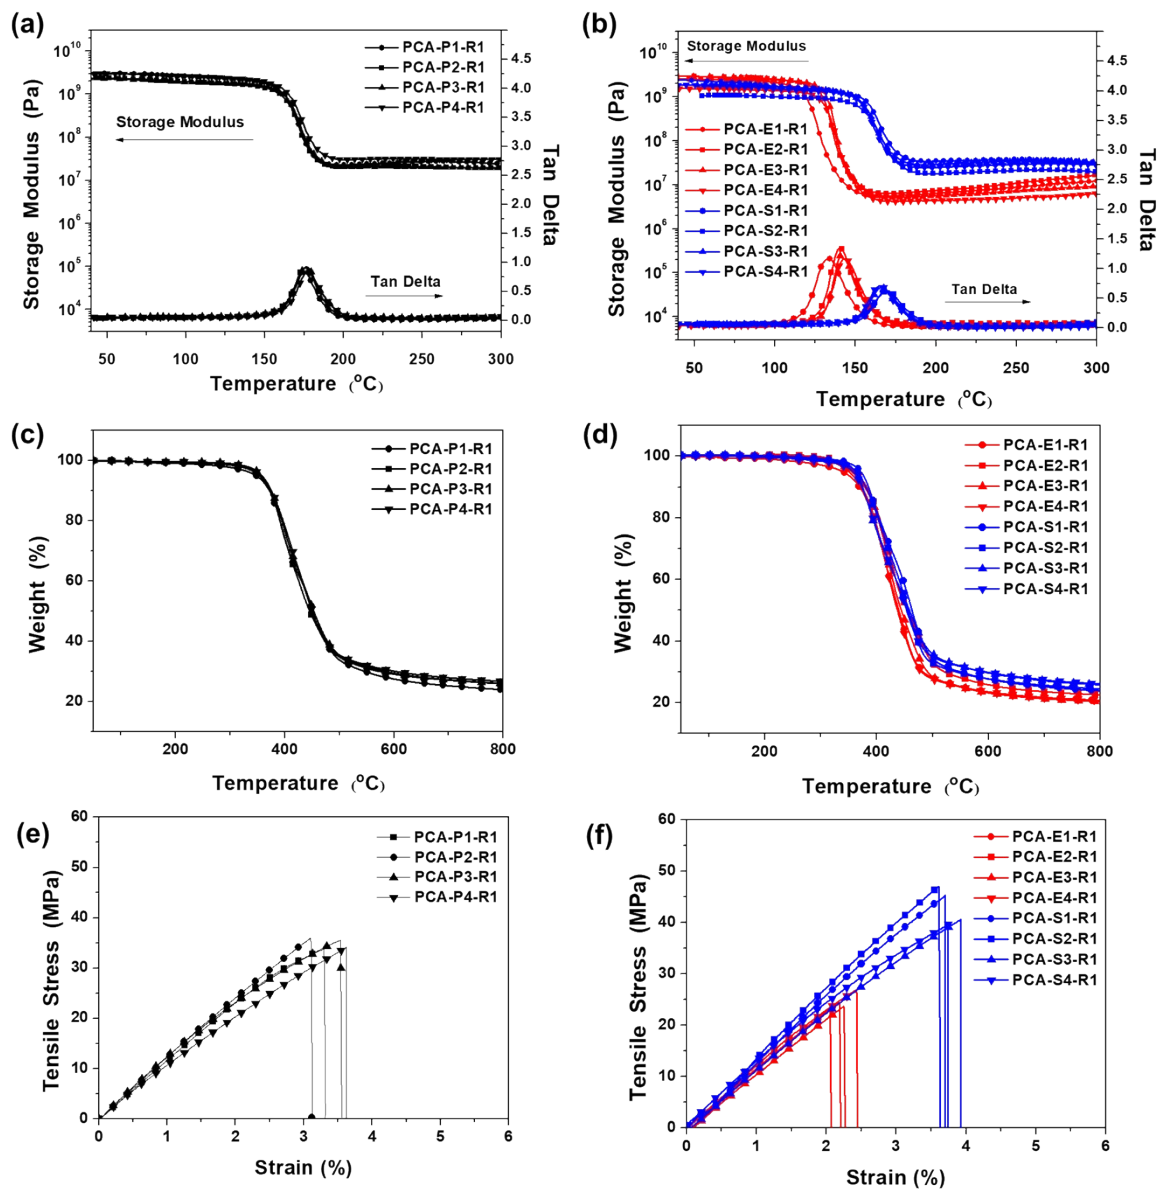

Figure S7. (a-b) DMA thermograms, (c-b) TGA thermograms, and (e-f) stress-strain curves of the first reprocessed PCAs with x = 1-4.

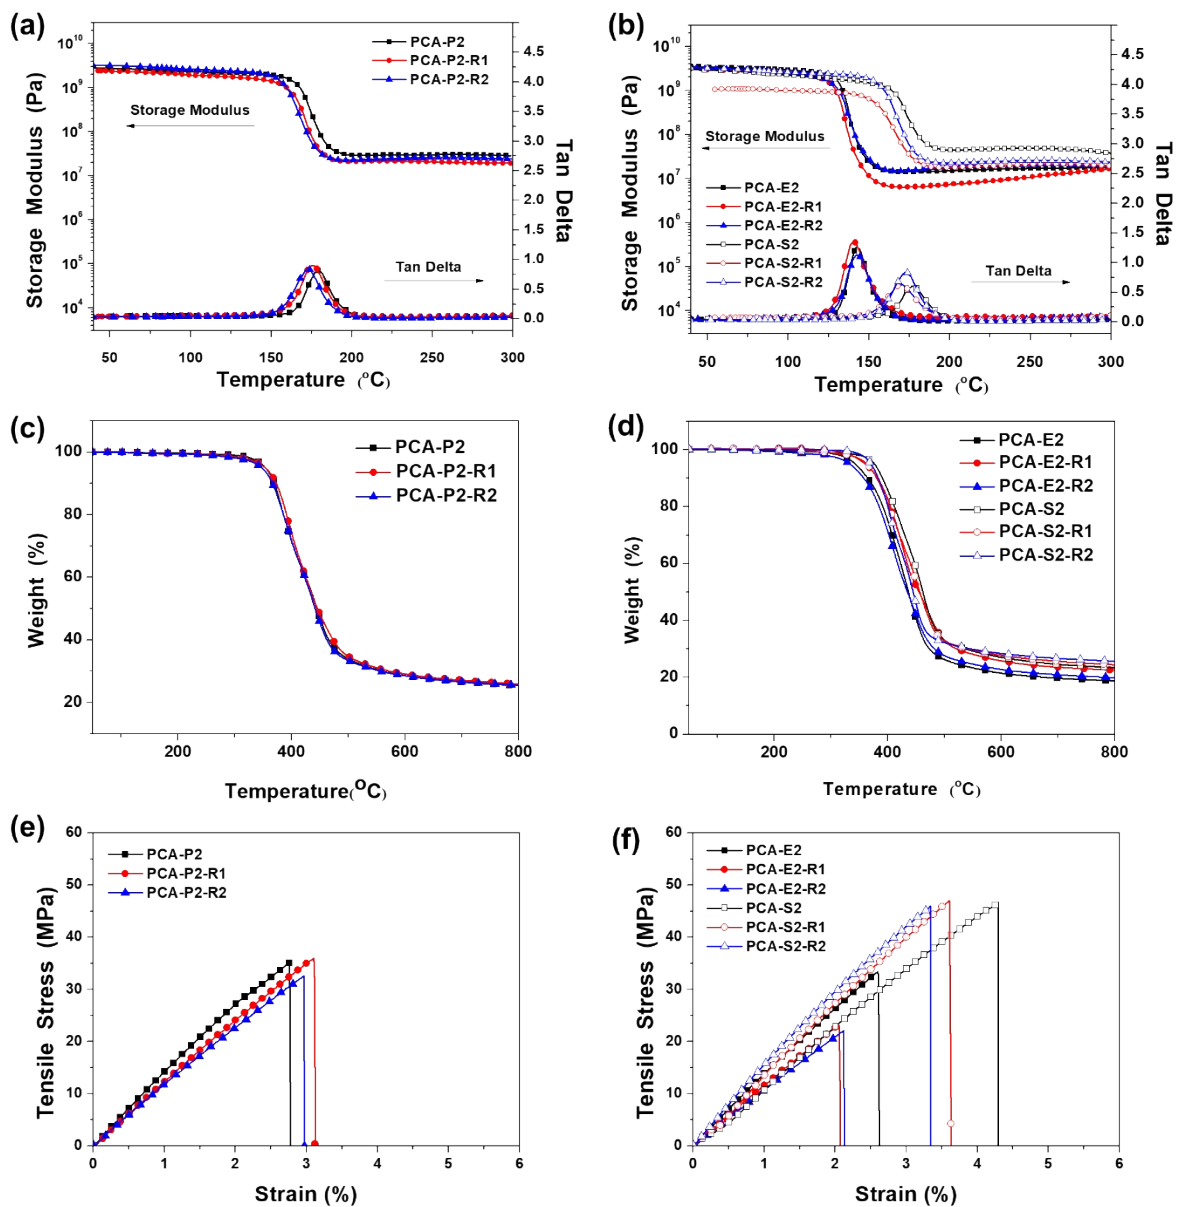

Figure S8. (a-b) DMA thermograms, (c-b)TGA thermograms, and (e-f) stress-strain curve for the original , the first reprocessed , and the second reprocessed PCAs with  $x=2$ .

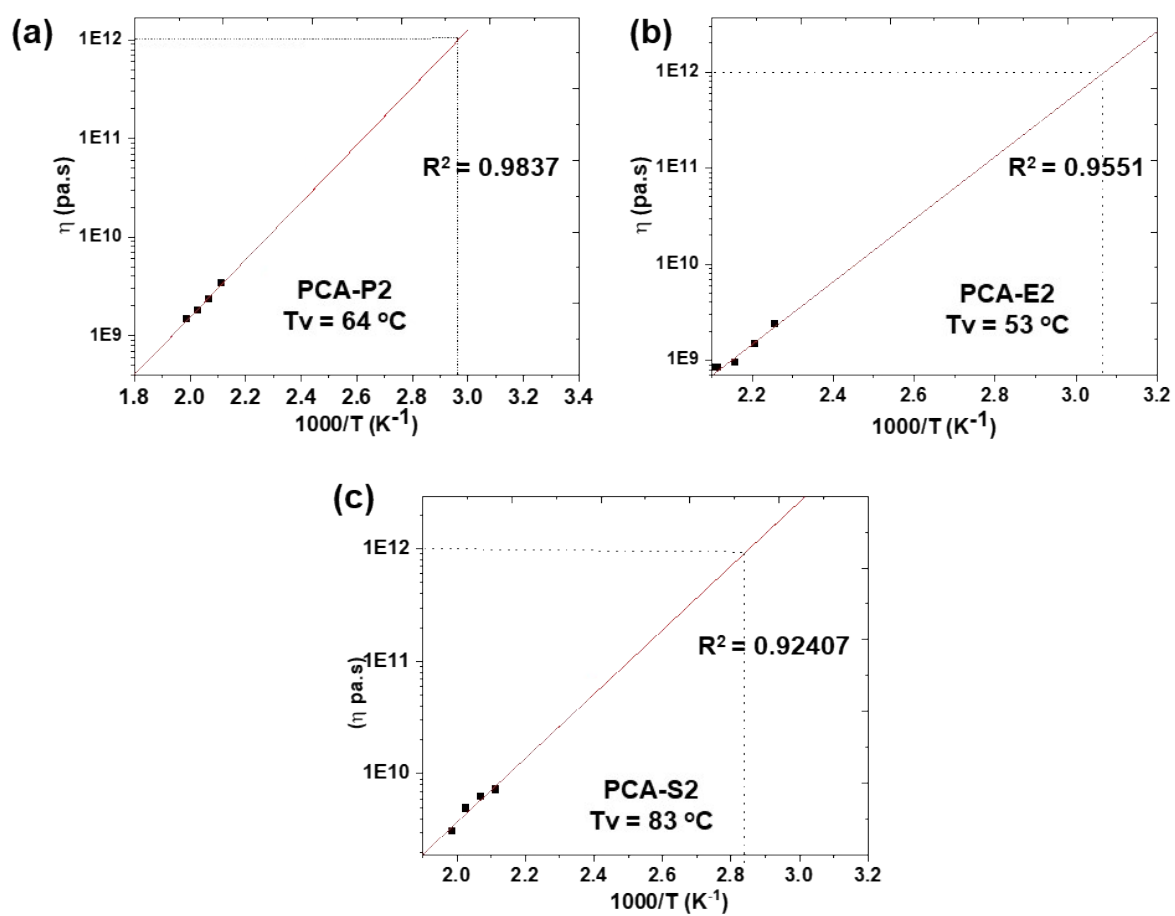

Figure S9. The graph of  $\log \eta$  vs  $1000/T$  for  $T_v$  determination.



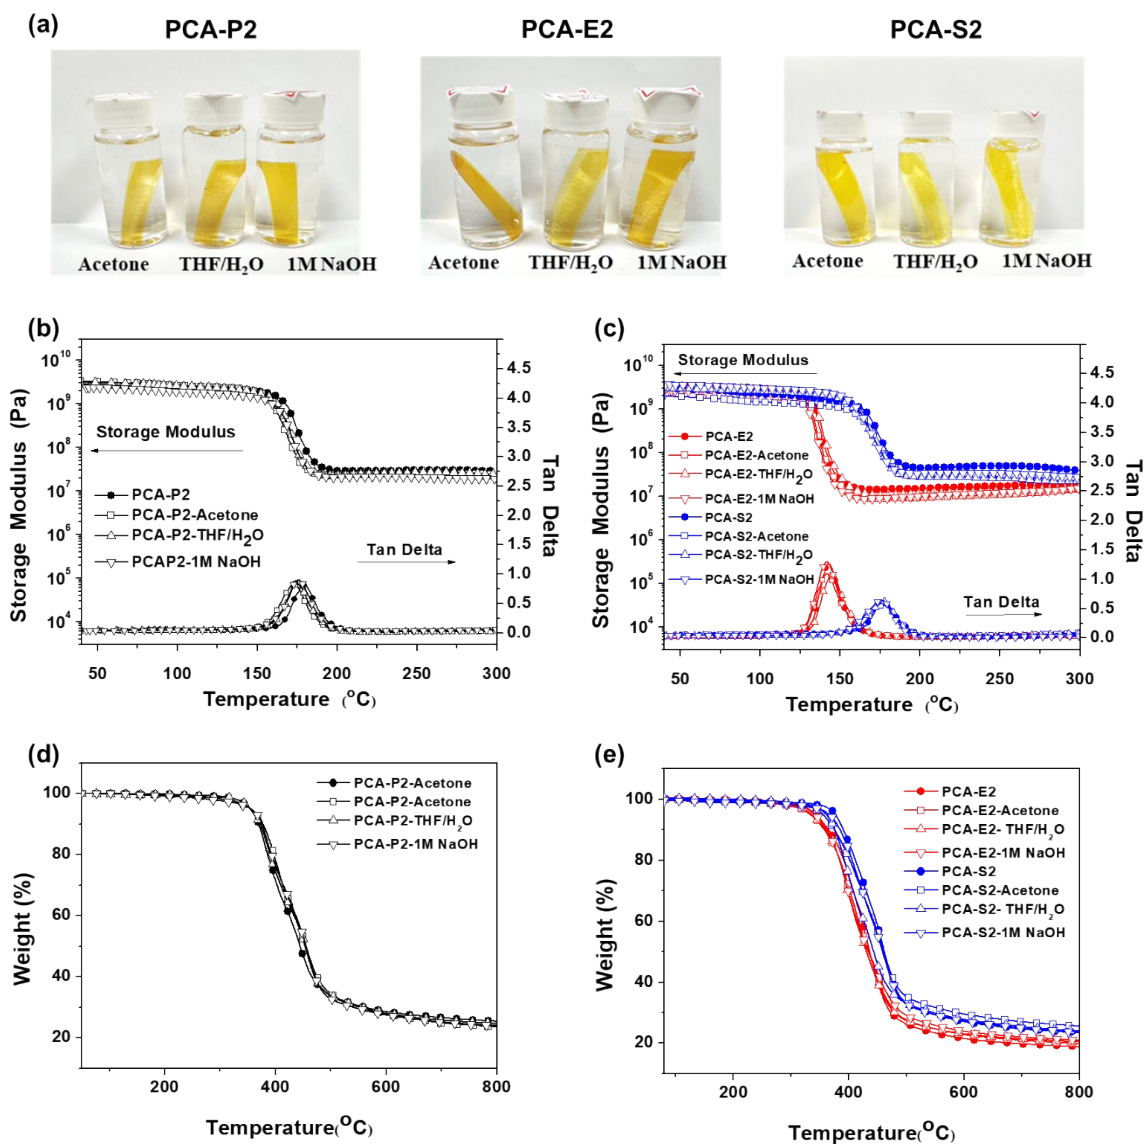

Figure S10. (a) Solvent resistance test of PCA-P2, PCA-E2, and PCA-S2. (b-c) DMA thermograms and (d-e) TGA thermograms of original PCA and solvent-immersed PCA films.



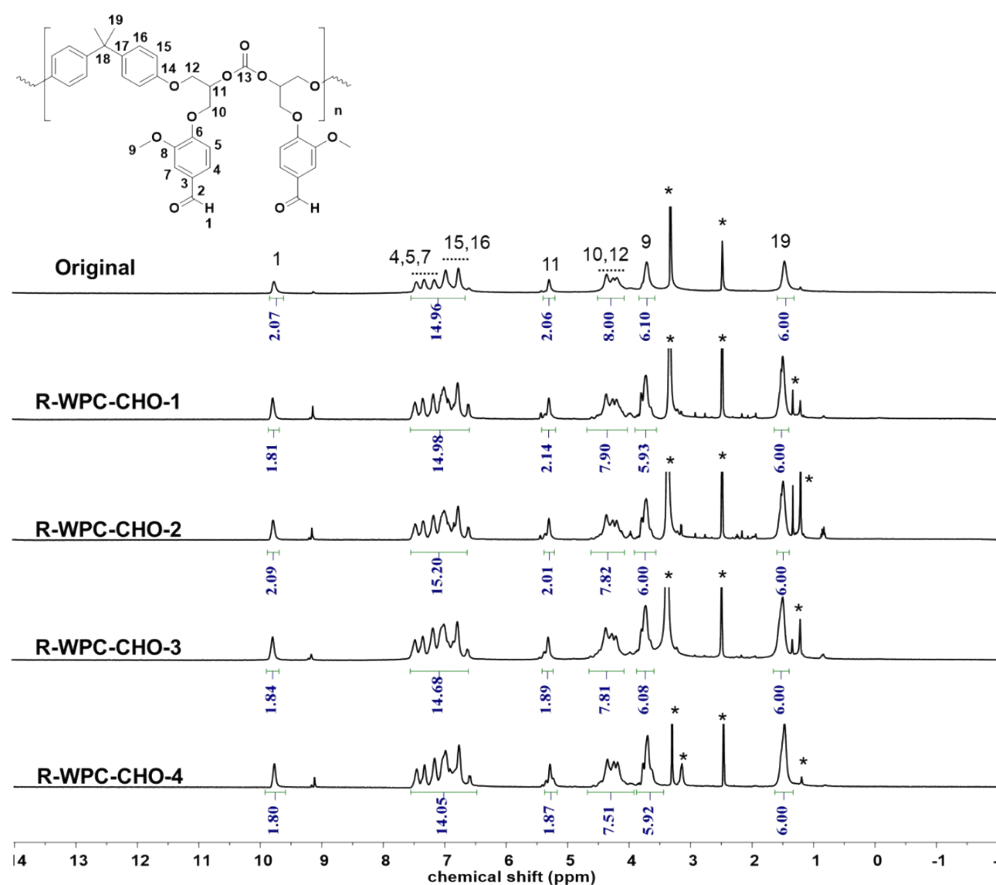

Figure S11.  $^1\text{H-NMR}$  spectra of the precipitate in the acid degradation of PCA-Px.

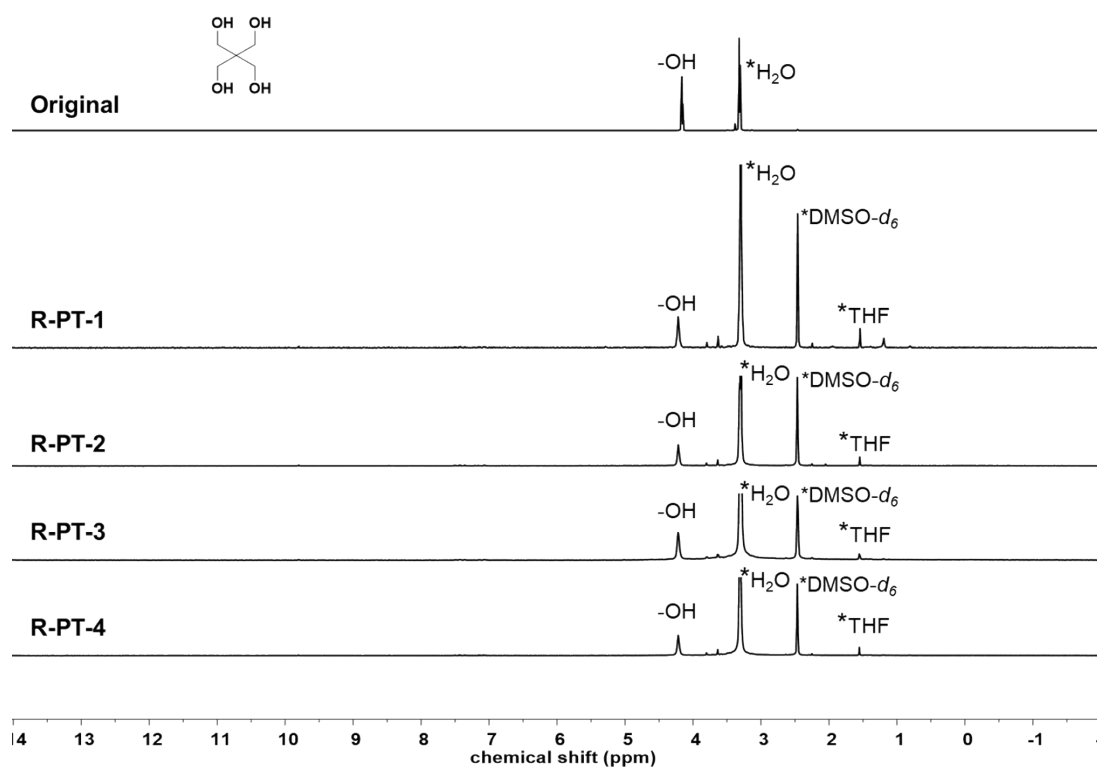

Figure S12.  $^1\text{H-NMR}$  spectra of the fresh and recycled pentaerythritol.

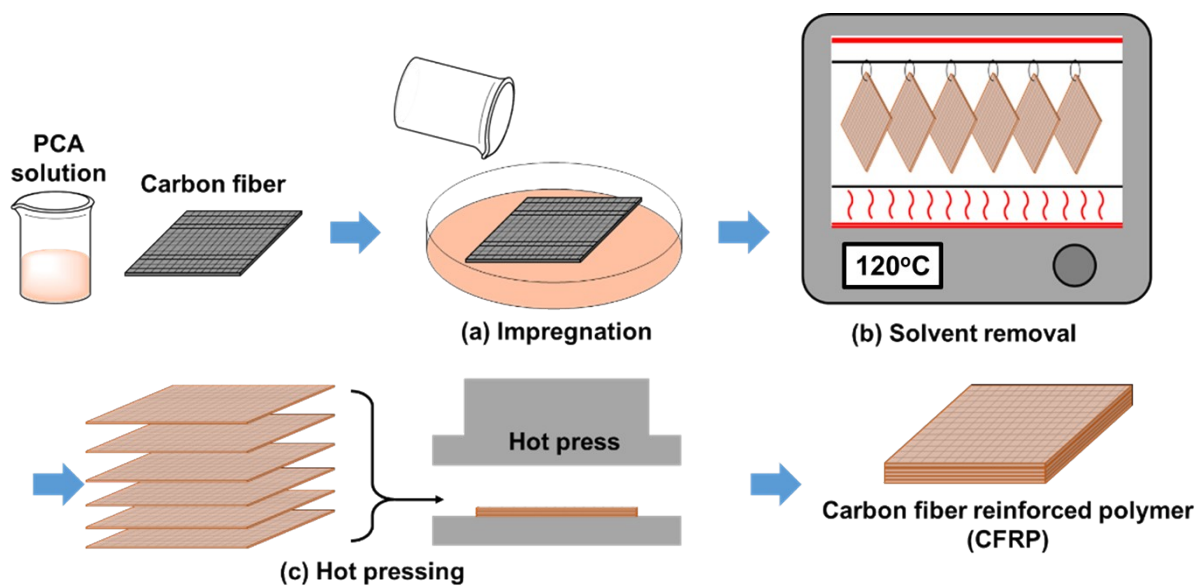

Figure S13. Schematic procedure used for preparing the CFRPs.

## References

1. S. Wang, S. Ma, Q. Li, X. Xu, B. Wang, W. Yuan, S. Zhou, S. You and J. Zhu, *Green chemistry*, 2019, **21**, 1484-1497.
